# Supplementary material for: pH-Responsive biodegradable polymeric micelles with anchors to interface magnetic nanoparticles for MR imaging in detection of cerebral ischemic area
Source: Royal Society of Chemistry journal article supplement (doi:10.1039/c5nr06542a), 2015-11-26
Supplement: c5nr06542a1.pdf [file c5nr06542a1.pdf]

Supporting Information

**pH-responsive biodegradable polymeric micelles with anchors to  
interface magnetic nanoparticles for MR Imaging in detection of  
cerebral ischemic area**

Hong Yu Yang,<sup>a</sup> Moon-Sun Jang,<sup>b</sup> Guang Hui Gao,<sup>c</sup> Jung Hee Lee<sup>\*b</sup> and Doo Sung Lee<sup>\*a</sup>

<sup>a</sup> Theranostic Macromolecules Research Center, School of Chemical Engineering, Sungkyunkwan

University, Suwon 440-746, Republic of Korea. E-mail: dslee@skku.edu

<sup>b</sup> Department of Radiology, Samsung Medical Center, Sungkyunkwan University School of Medicine  
and Center for Molecular and Cellular Imaging, Samsung Biomedical Research Institute, Seoul 135-  
710, Republic of Korea.

<sup>c</sup> Engineering Research Center of Synthetic Resin and Special Fiber, Ministry of Education, Changchun  
University of Technology, Changchun 130012, China

## Supporting information:

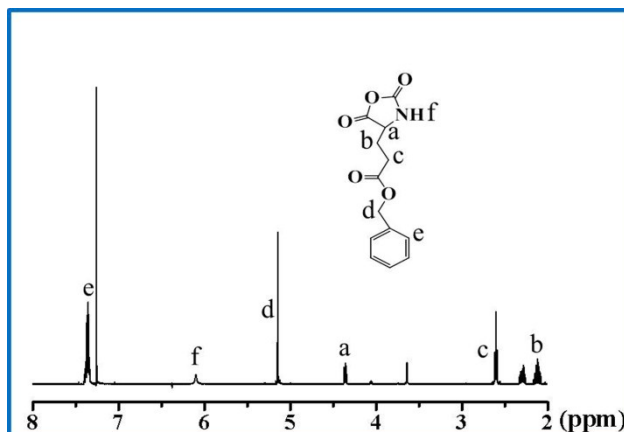

Fig. S1 <sup>1</sup>H NMR spectra of BLG-NCA (500MHz, CDCl<sub>3</sub>)

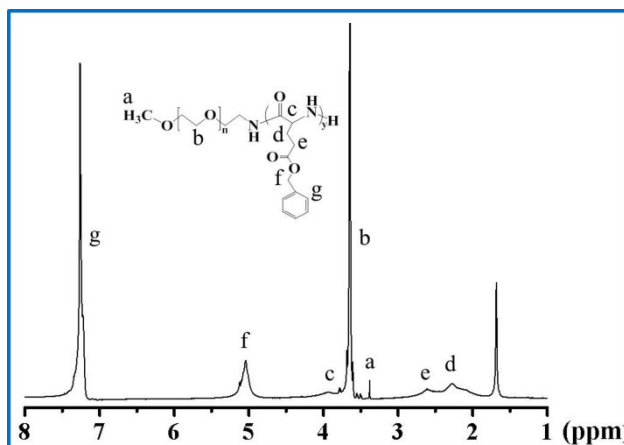

Fig. S2 <sup>1</sup>H NMR spectra of mPEG-PBLG (500MHz, CDCl<sub>3</sub>)

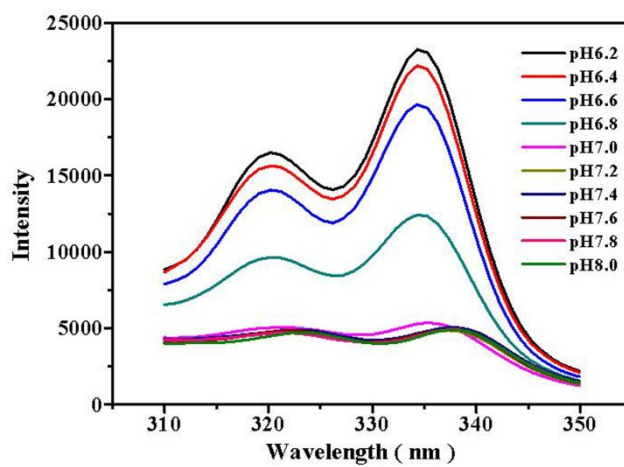

Fig. S3 Fluorescence intensity of pyrene at different pH in mPEG-P(DPA-DE)LG copolymer solution (1mg/mL).

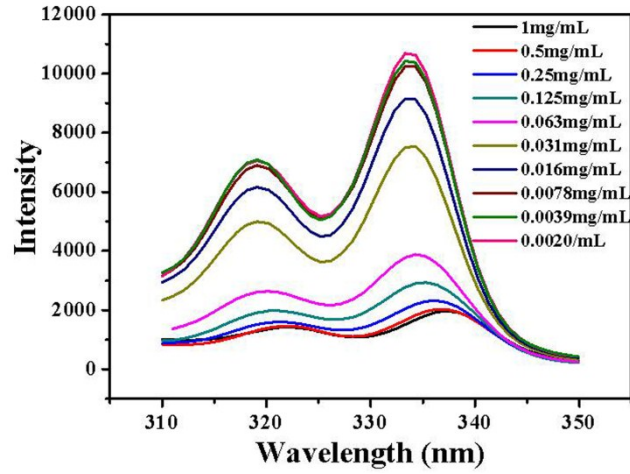

**Fig. S4** Fluorescence intensity of pyrene in mPEG-P(DPA-DE)LG copolymer solution of different concentrations.

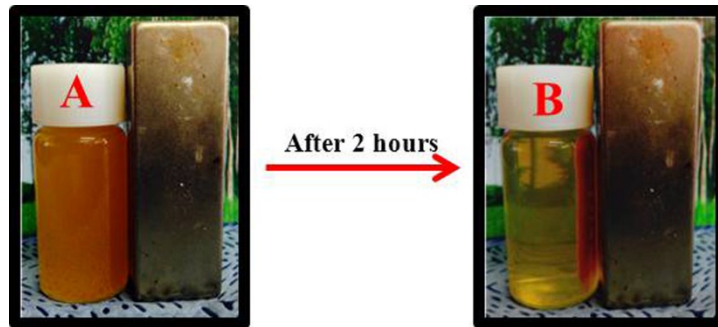

**Fig. S5** photographs of the Fe<sub>3</sub>O<sub>4</sub>-loaded mPEG-b-P(DPA-DE)LG polymeric micelles aqueous solution with applied magnetic field at 0 h(A) and 2h (B).
